# Supplementary material for: Role of salicylic acid glucosyltransferase in balancing growth and defence for optimum plant fitness
Source: PubMed Central journal article supplement (PMC7036366; doi:10.1111/mpp.12906), 2020-01-21
Supplement: MPP-21-429-s012.pdf [file MPP-21-429-s012.pdf]

Table S1 Oligonucleotide primers used in RT-qPCR analyses

| Primer name | Sequence (5' - 3')    | Accession number |
|-------------|-----------------------|------------------|
| NtPR1a F    | ATGCGCAAATTATGCTTCC   | X06930           |
| NtPR1a R    | CATTGACCCACATCTCAACG  |                  |
| NtPR1b F    | GATGTAGGCGTGGAACCATT  | X03465           |
| NtPR1b R    | TTGGCCATGAGAATGTACGA  |                  |
| NtCoi1 F    | GGTGCAGTTACGCACAGAGG  | AB433899         |
| NtCoi1 R    | CCTCTCGGTCAAGCAAACC   |                  |
| NtPDF 1.2 F | CTACCGAGATGGGACCAATG  | AB034956         |
| NtPDF 1.2 R | ATCCTTCGGTCAGACAAACG  |                  |
| NtEREBP1 F  | TTGCAGCTGAGAAATCTGGA  | AF057373         |
| NtEREBP1 R  | AACTTCGGAGCGCAAGATTA  |                  |
| NtEREBP2 F  | GTCTCATGCCATGTTTGACG  | D38126           |
| NtEREBP2 R  | AGGAATCGTAGCTGGCTCAA  |                  |
| NtERF1 F    | GCGGTTCAAAGGCTCATTTA  | D38123           |
| NtERF1 R    | TGCAACAGCCTTTCTTCTCC  |                  |
| NtPAL F     | CACCAATTGGTGTCTCTATGG | AB289452         |
| NtPAL R     | GTCAGATTAGATGGCAACCC  |                  |

Table S1 Oligonucleotide primers used in RT-qPCR analyses (continued)

| Primer name            | Sequence (5' - 3')        | Accession number |
|------------------------|---------------------------|------------------|
| NtICS F                | CTCCAGCAGTTTGTGGGTATC     | AY740529         |
| NtICS R                | TCCAAACCAACCAACAGGAC      |                  |
| NtSAGT F               | GTCGTGTCATGGTGTCCACAATTAC | AF190634         |
| NtSAGT R               | CTGGTCTGACCAATGTGGCATTG   |                  |
| NtRDR1 F               | GCATTGAACACGCCTTGGA       | AJ011576         |
| NtRDR1 R               | GCAGAACCCGATTGGATACG      |                  |
| NtRDR6 F               | CTCAGCTTGGGGACCTCA        | FJ966891         |
| NtRDR6 R               | CAGCCTCCAGAATCCTCAC       |                  |
| NtEF1 $\alpha$ F       | CCACACCTCCCACATTGCTGTCA   | D63396           |
| NtEF1 $\alpha$ R       | CGCATGTCCCTCACAGCAAAC     |                  |
| NbSAGT F <sup>a)</sup> | GCAATTTACAGGACAACCACG     | AF190634         |
| NbSAGT R <sup>b)</sup> | TATGATGATGGTGGCCGTGAG     |                  |
| NbSAGT 210F            | CACCGCAAGCTGGAACCTTTGTGG  |                  |
| NbSAGT 809R            | ACTGAGCTAGCTGGTTGATGG     |                  |
| NbL23 F <sup>c)</sup>  | AAGGATGCCGTGAAGAAGATGT    | XM_016619600     |
| NbL23 R <sup>d)</sup>  | GCATCGTAGTCAGGAGTCAACC    |                  |

a) to d): The specificity of the nucleotide sequence was confirmed by BLAST analyses based on AF190634 and XM\_016619600 at the website of “Nicotiana benthamiana Genome & Transcriptome” ([benthgenome.gut.edu.au](http://benthgenome.gut.edu.au)) and by nucleotide sequencing of the qPCR products.
